# Supplementary material
Source: PubMed Central journal article supplement (PMC1937538)

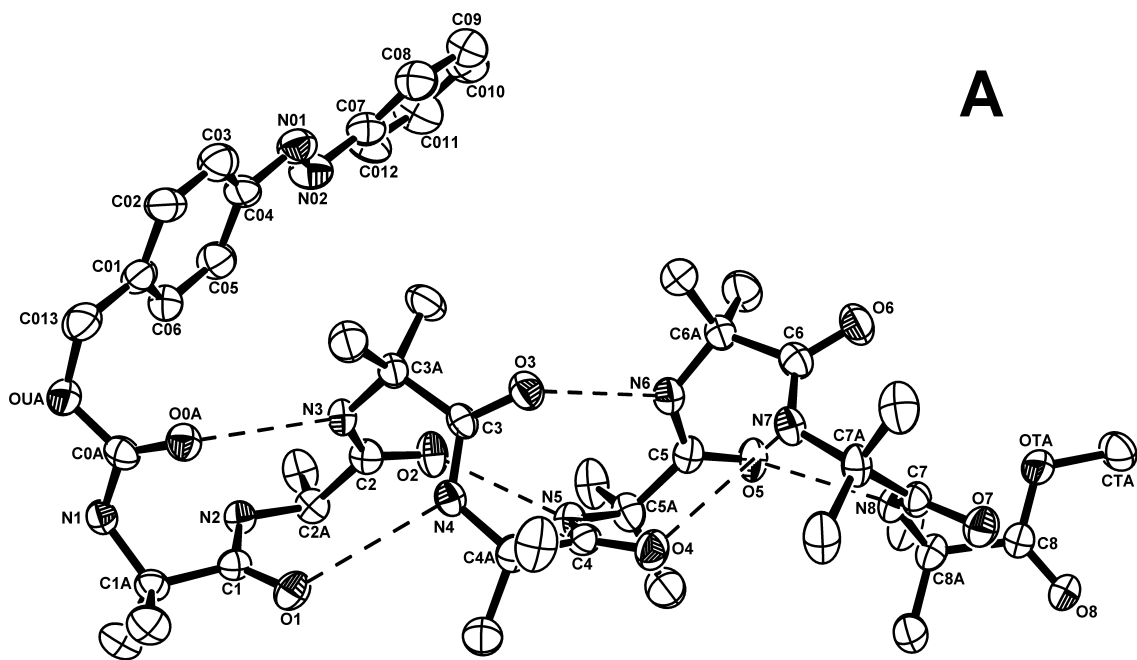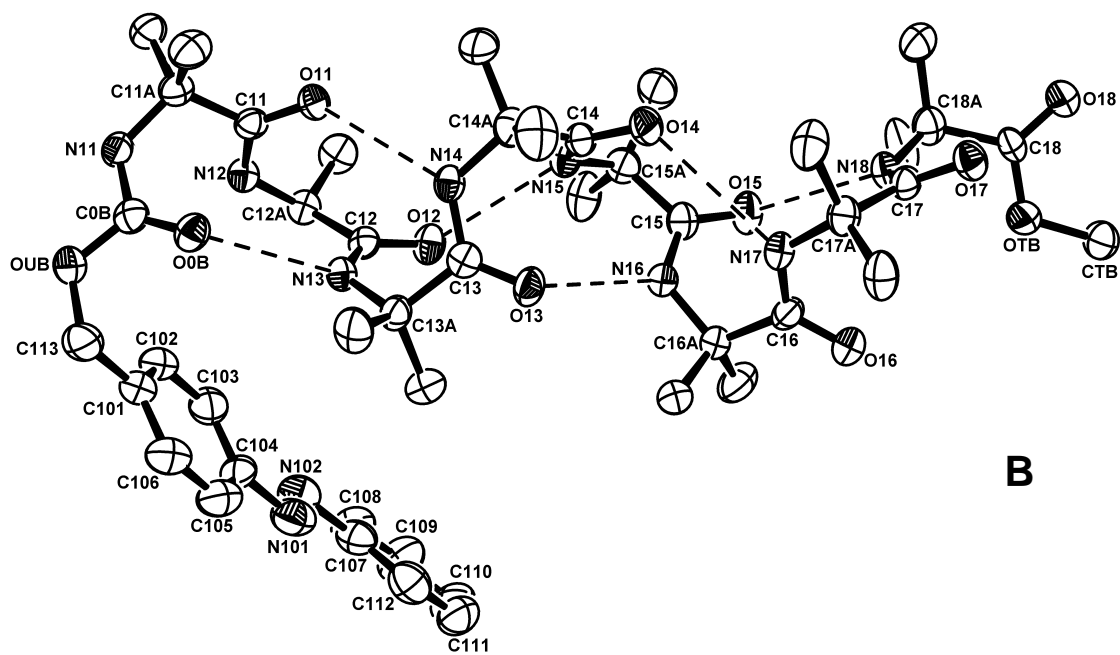

Supplement: pnas_0701762104_1.pdf [file pnas_0701762104_1.pdf]

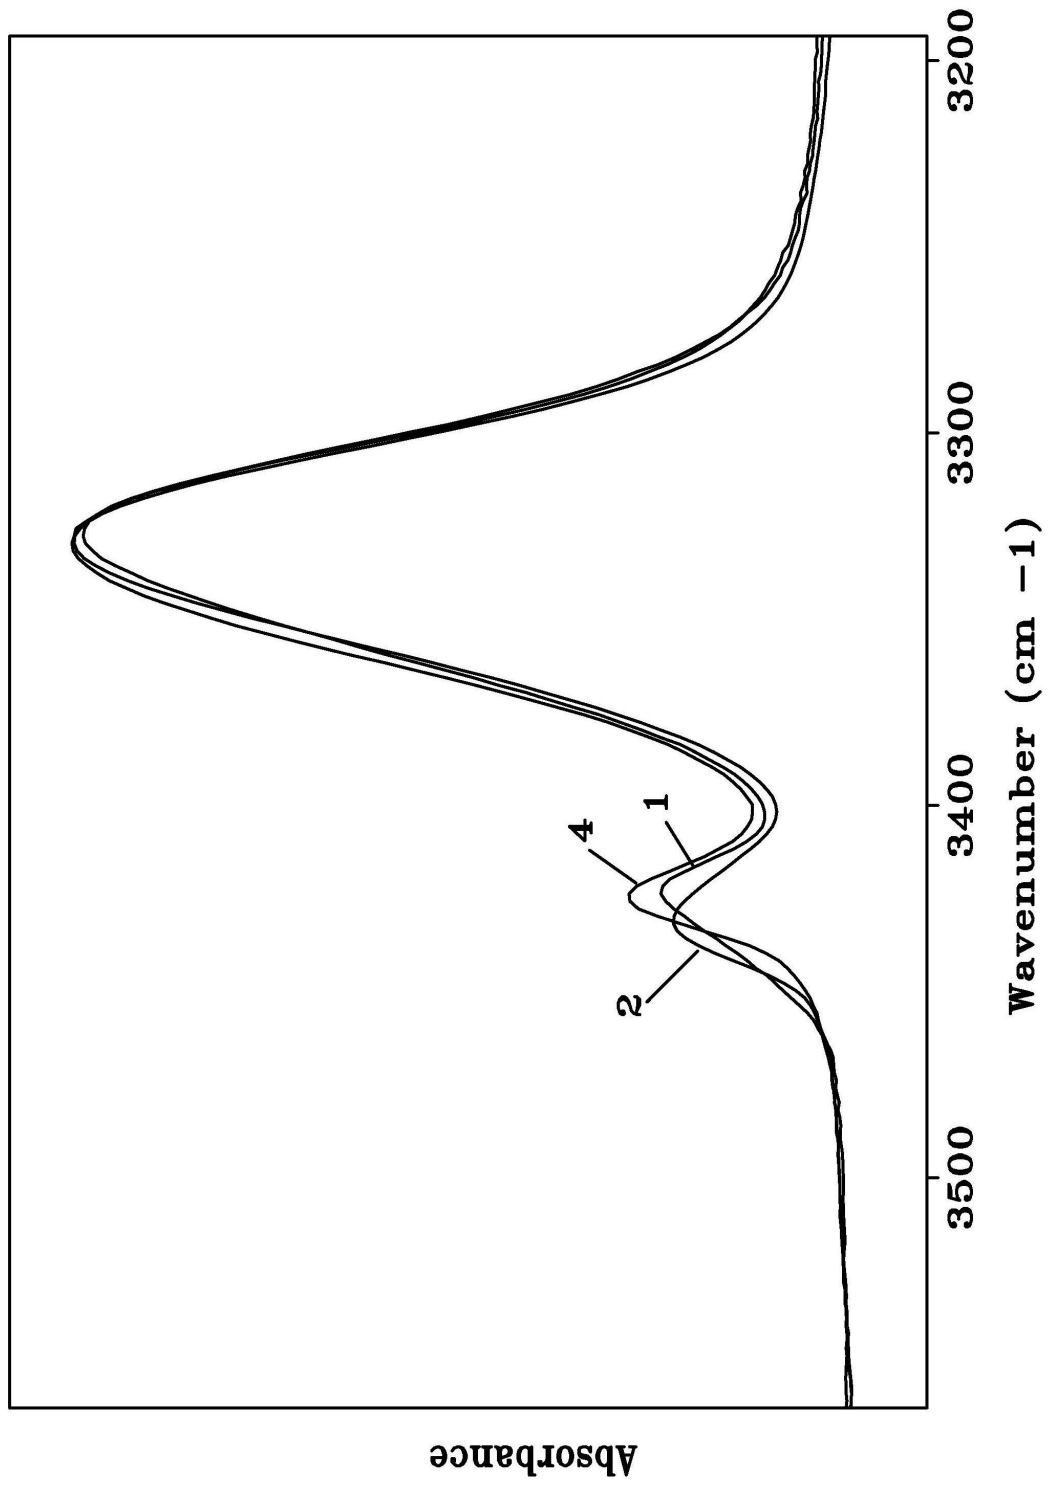

Supplement: pnas_0701762104_2.pdf [file pnas_0701762104_2.pdf]

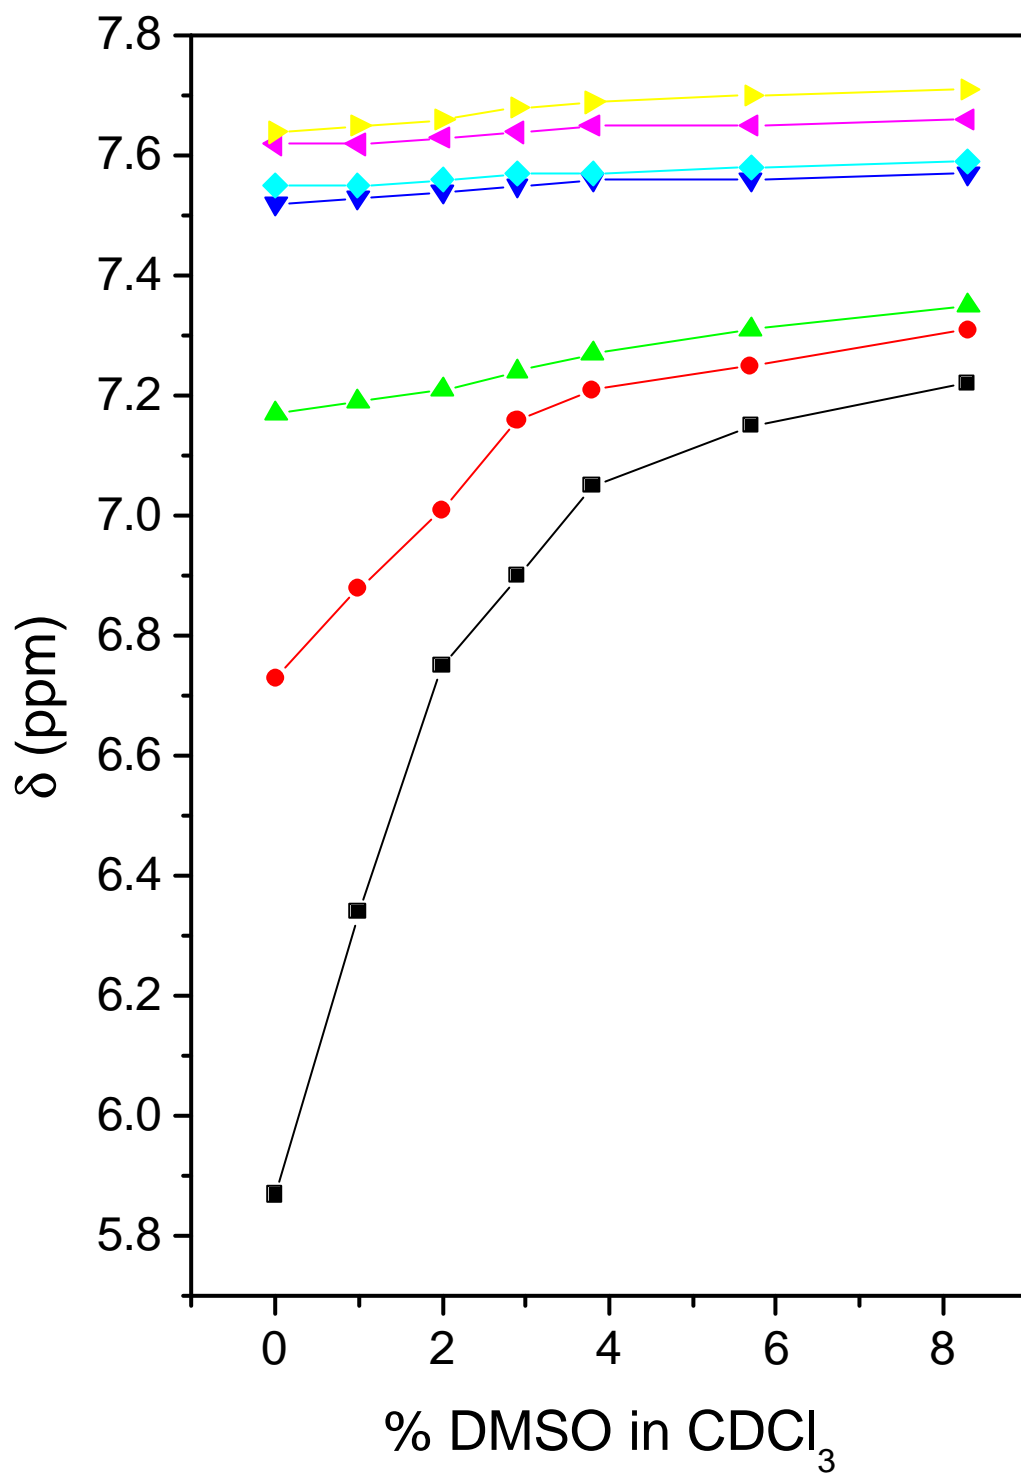

Supplement: pnas_0701762104_3.pdf [file pnas_0701762104_3.pdf]

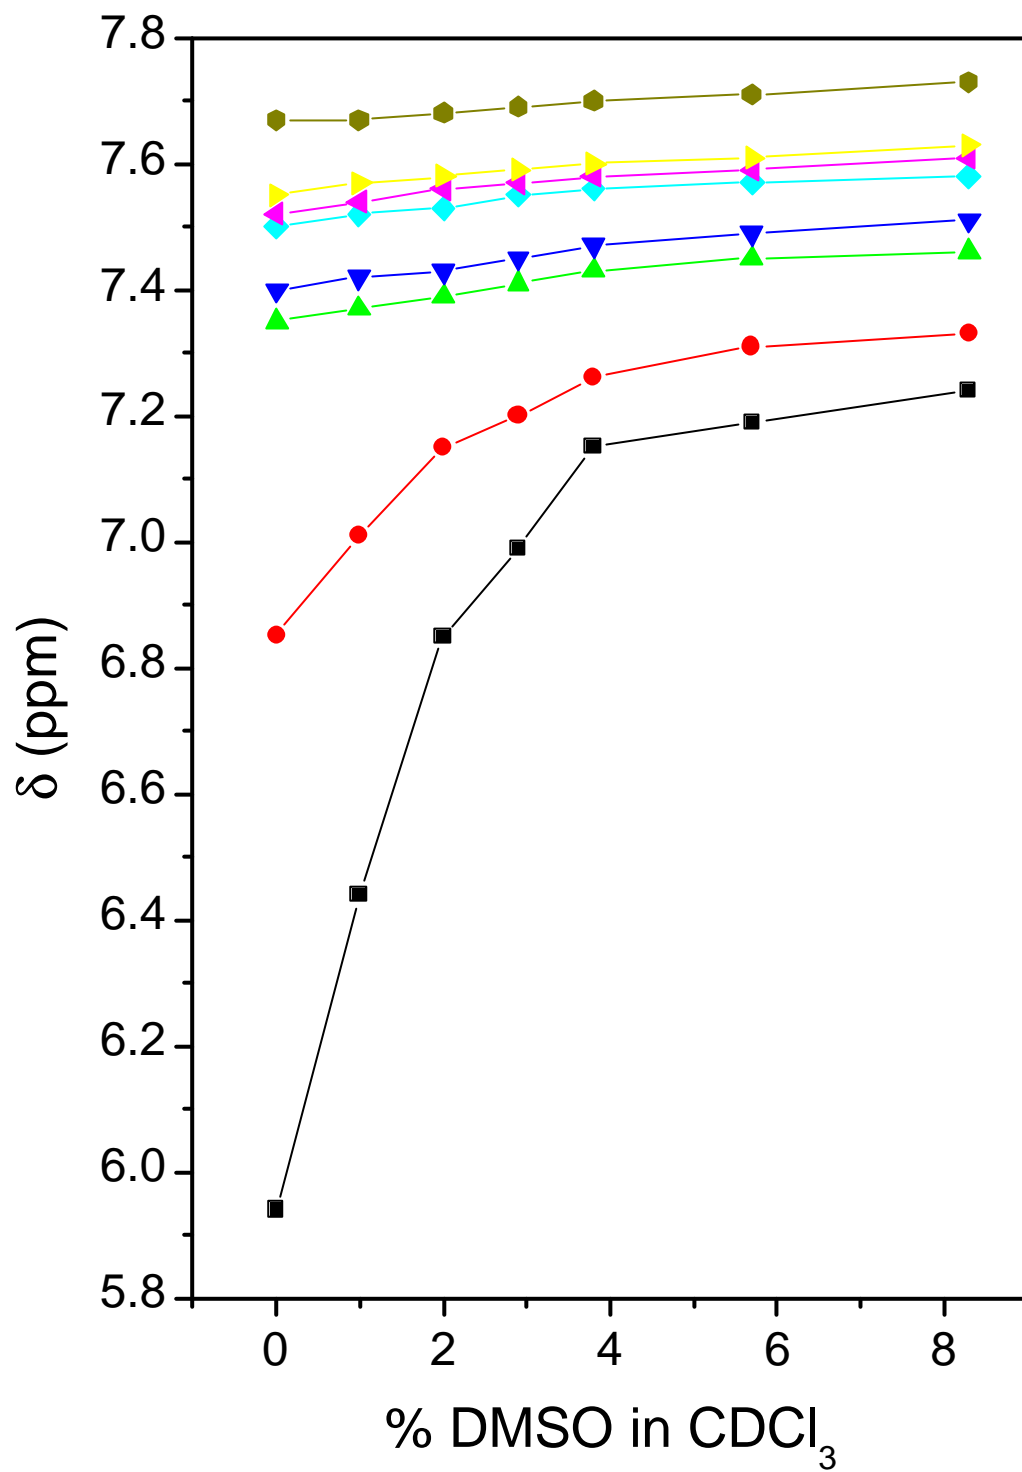

Supplement: pnas_0701762104_4.pdf [file pnas_0701762104_4.pdf]

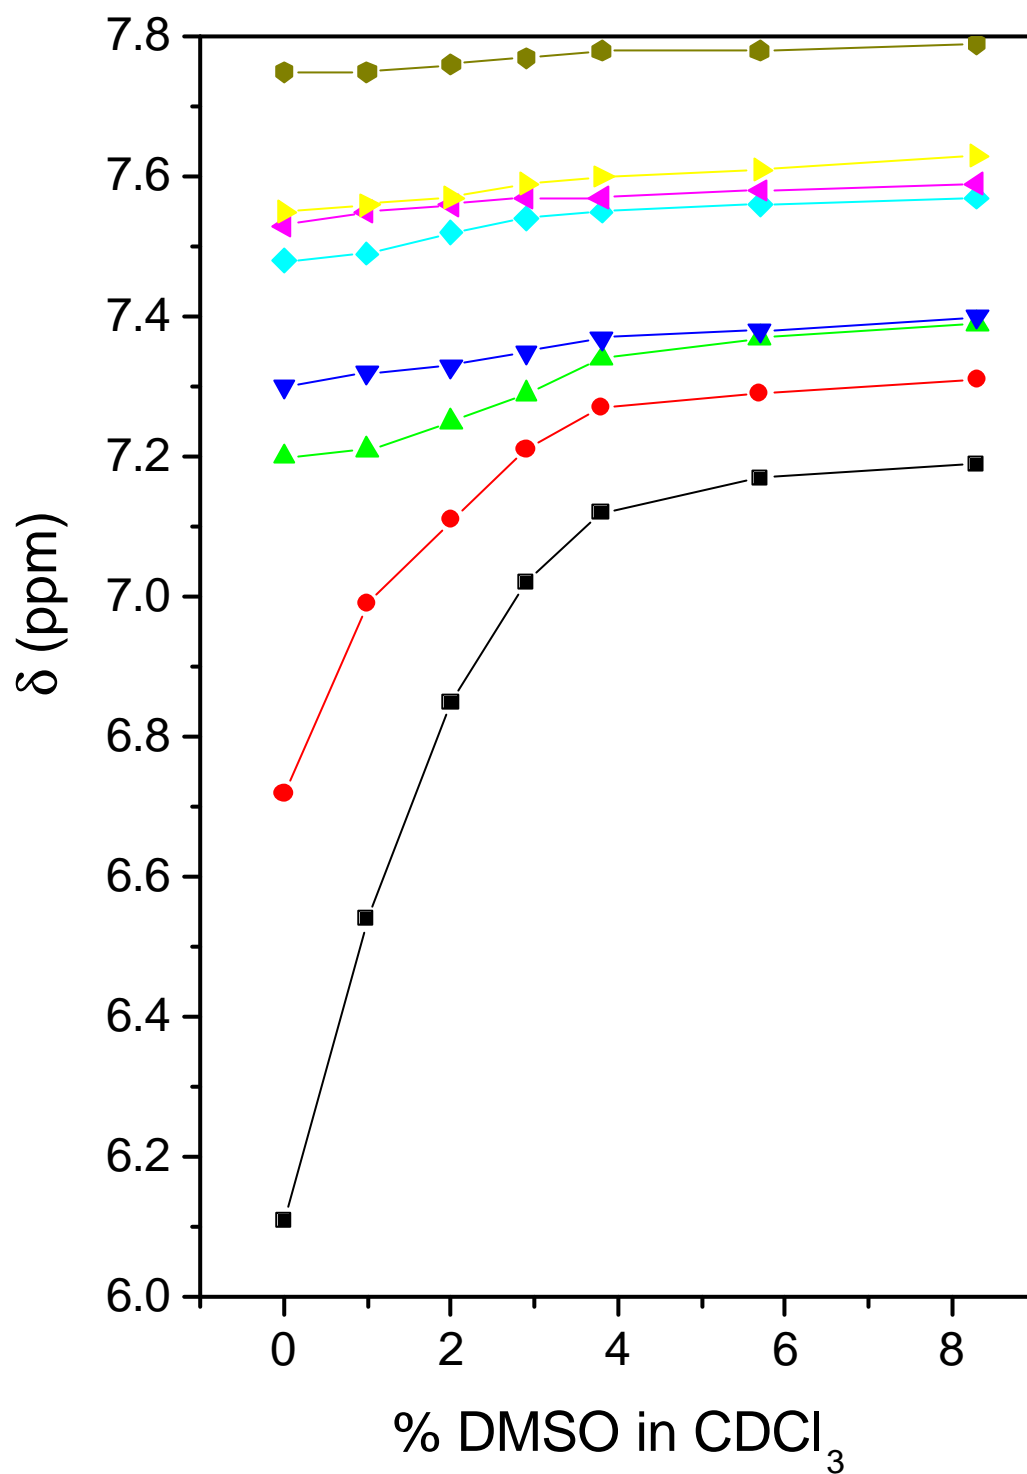

Supplement: pnas_0701762104_5.pdf [file pnas_0701762104_5.pdf]

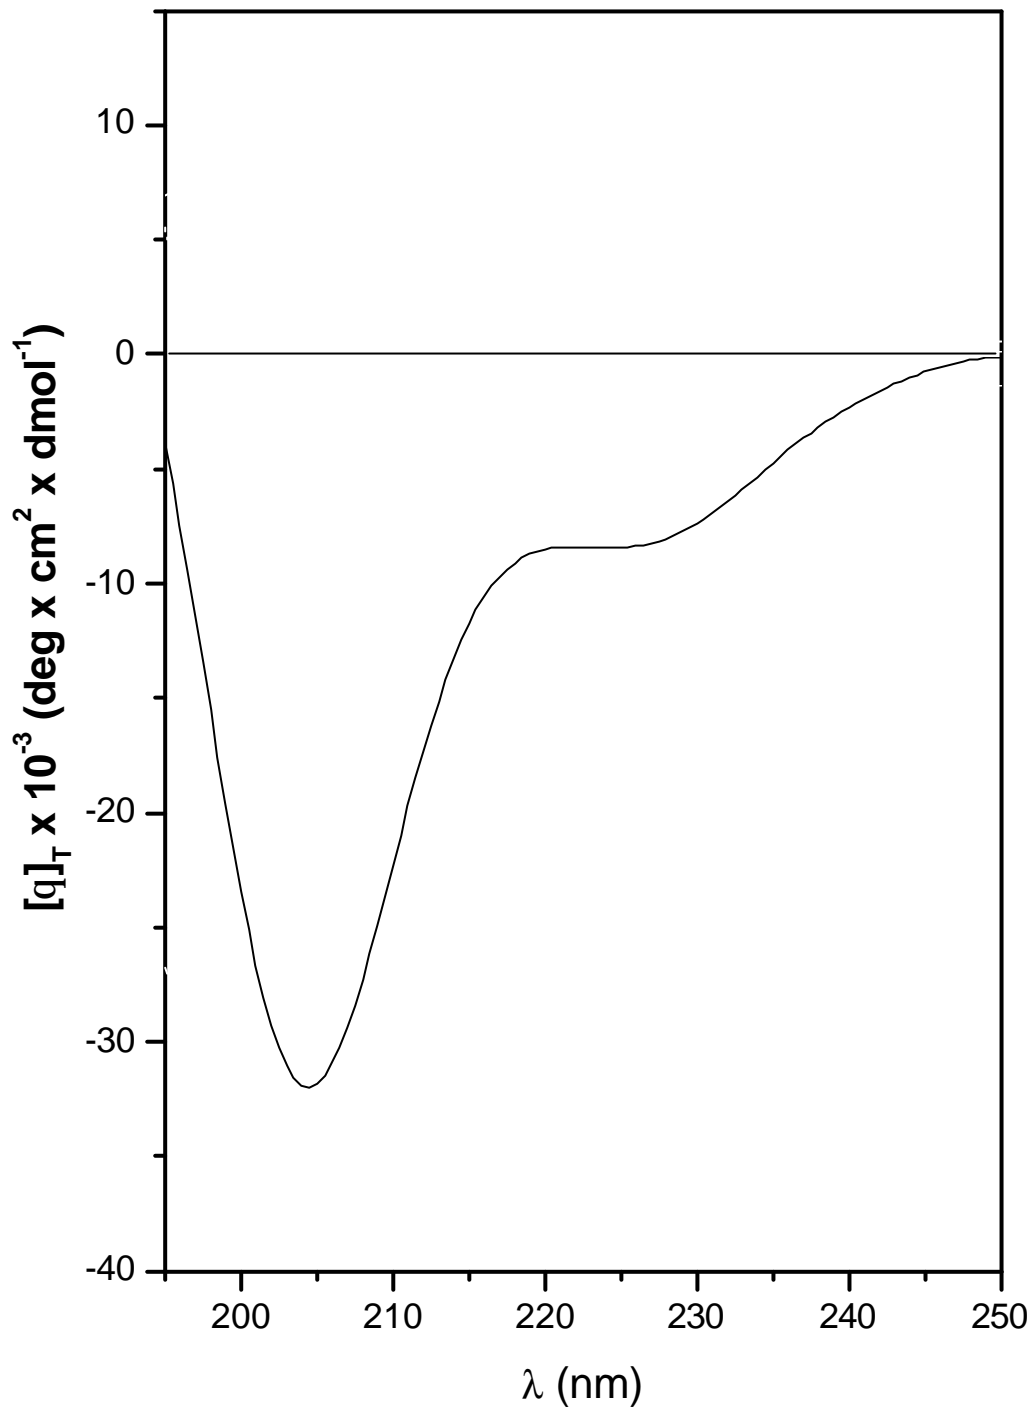

Supplement: pnas_0701762104_6.pdf [file pnas_0701762104_6.pdf]

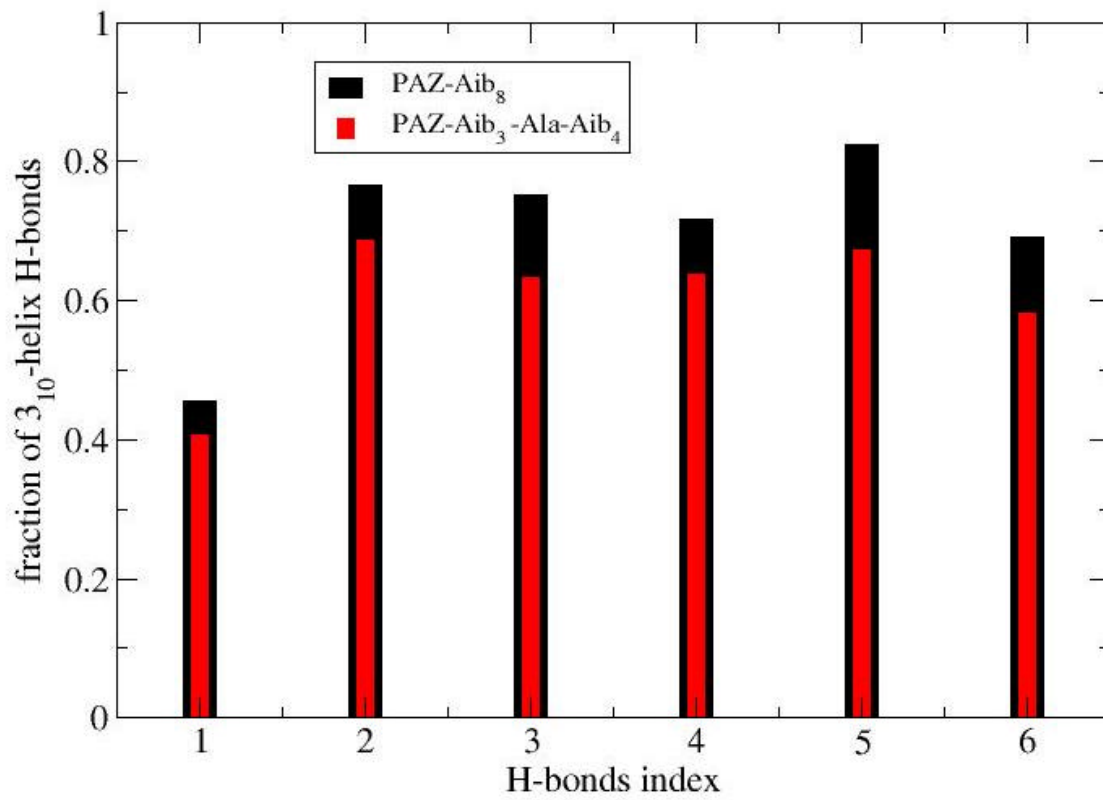

Supplement: pnas_0701762104_7.pdf [file pnas_0701762104_7.pdf]

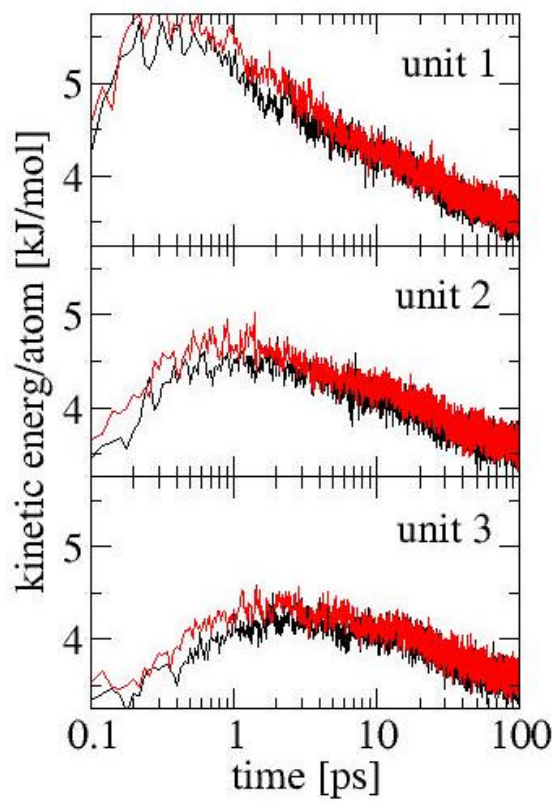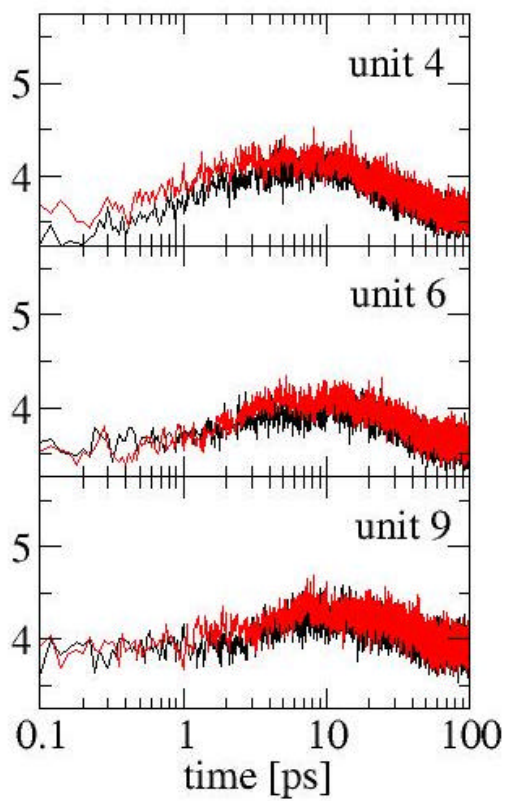

Supplement: pnas_0701762104_8.pdf [file pnas_0701762104_8.pdf]

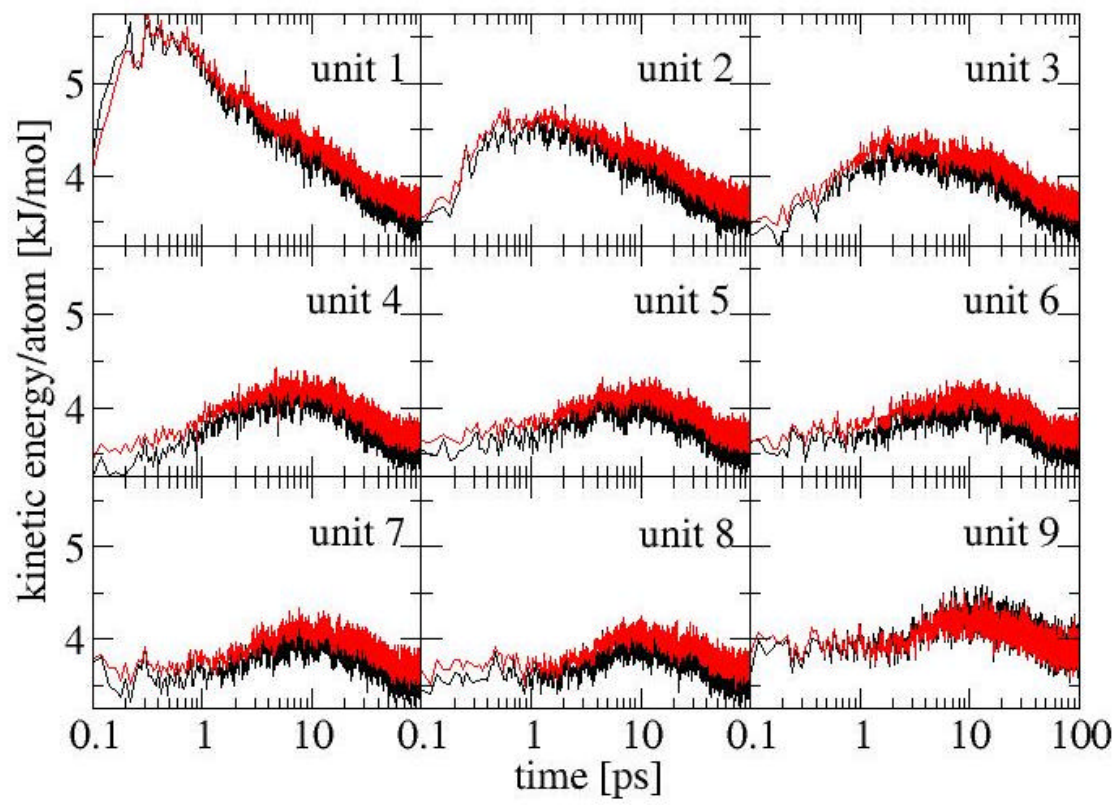

Supplement: pnas_0701762104_9.pdf [file pnas_0701762104_9.pdf]
